# Supplementary material
Source: PubMed Central journal article supplement (PMC4965317)

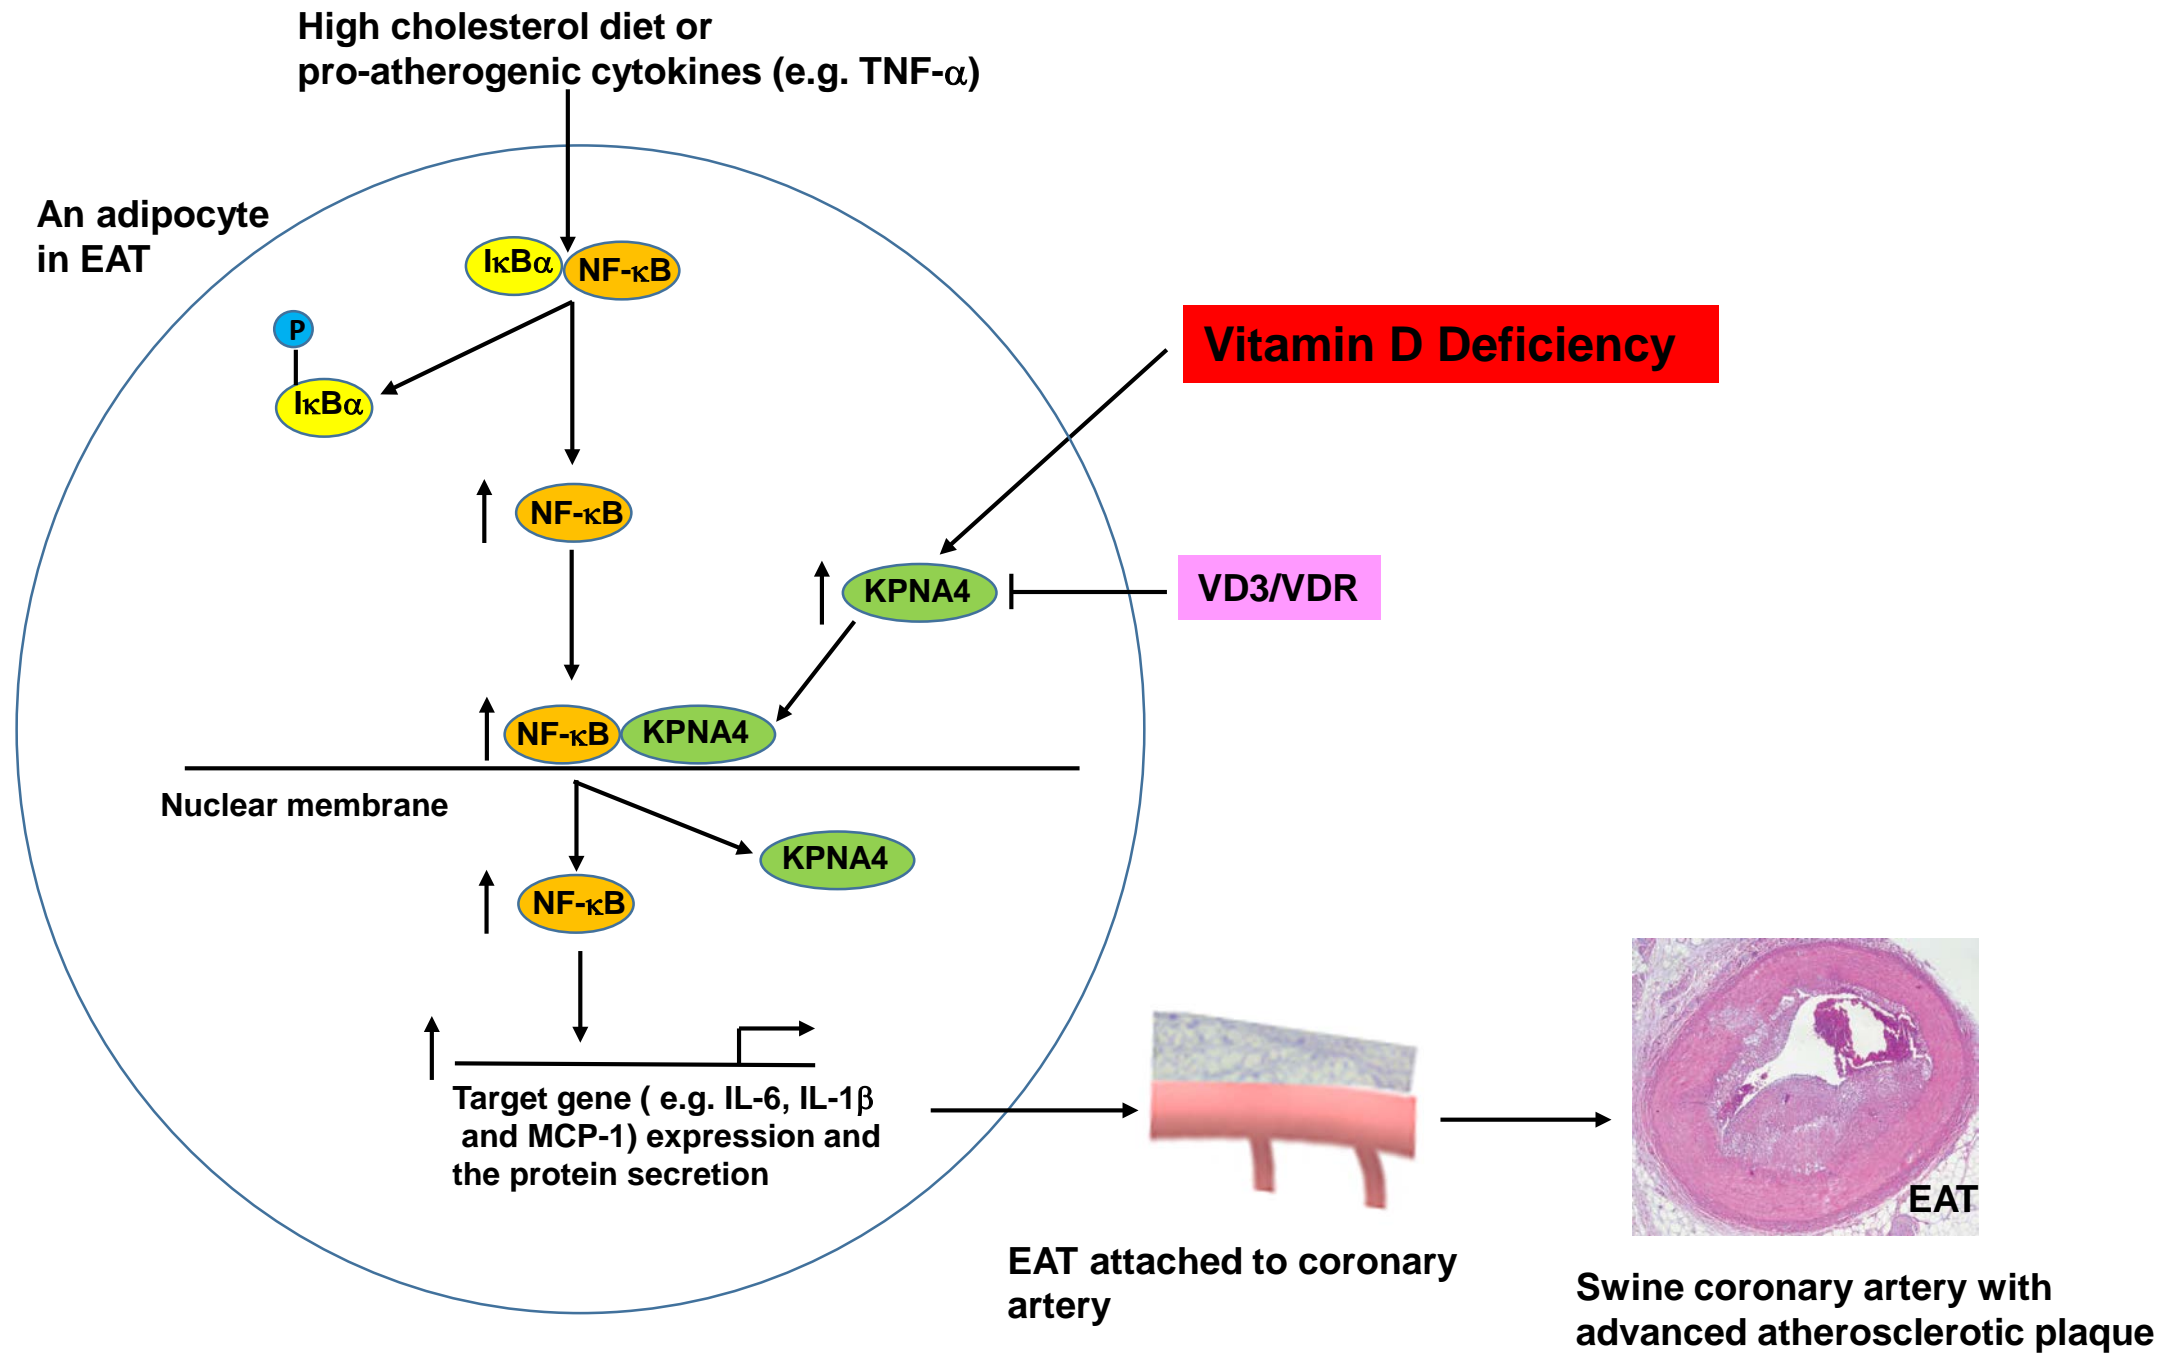

Supplement: NIHMS790453-supplement-Graphic_Abstract.pdf [file NIHMS790453-supplement-Graphic_Abstract.pdf]

A

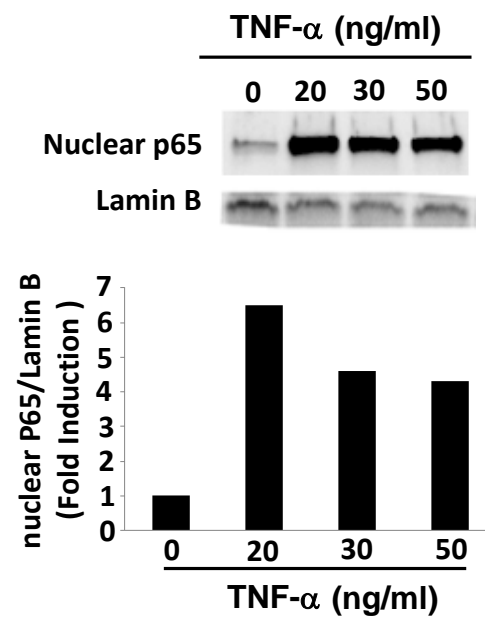

B

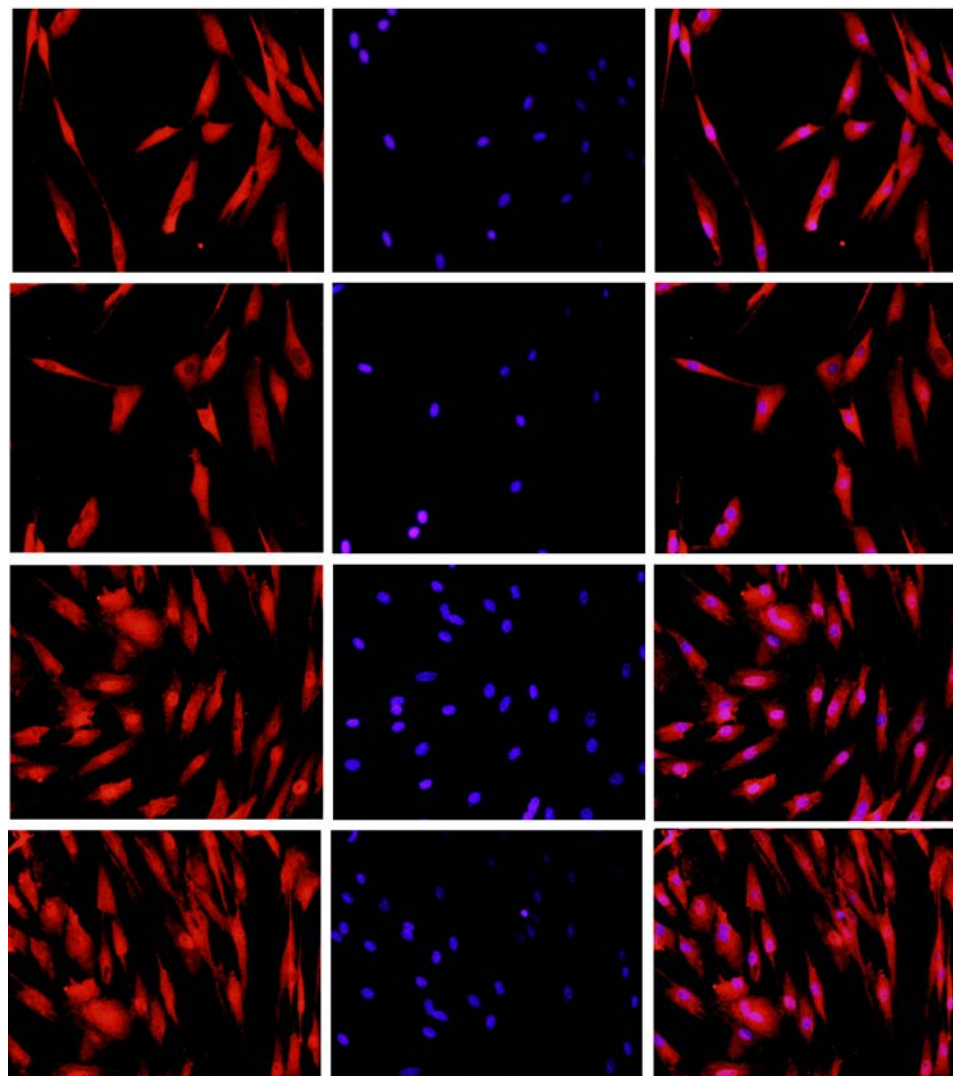

A

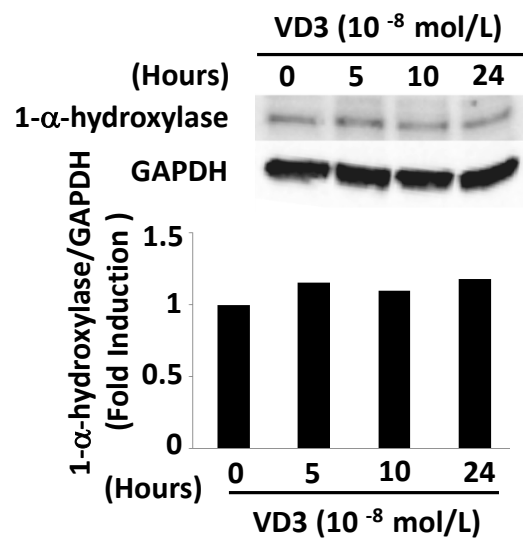

B

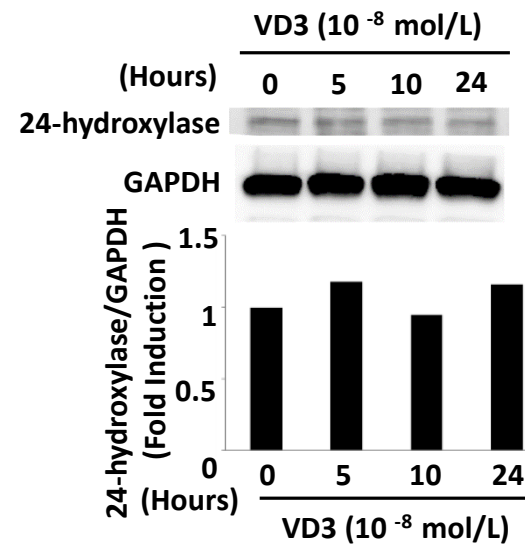

C

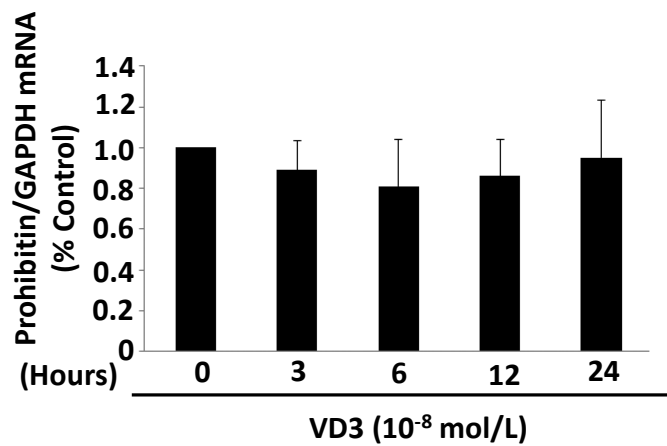

D

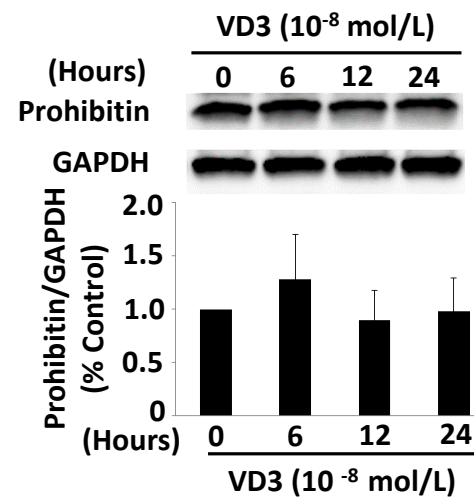

A

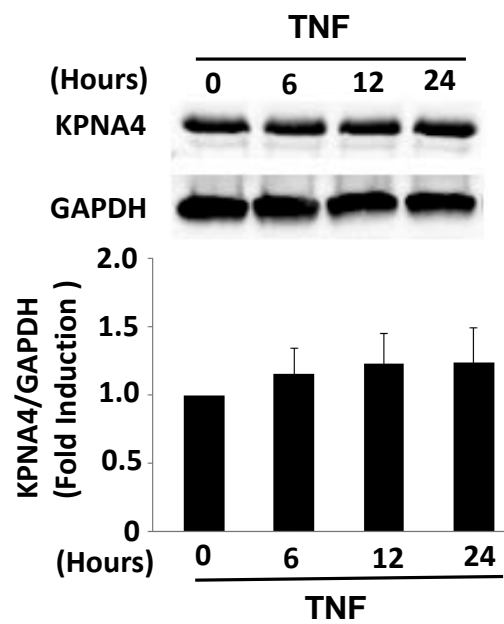

B

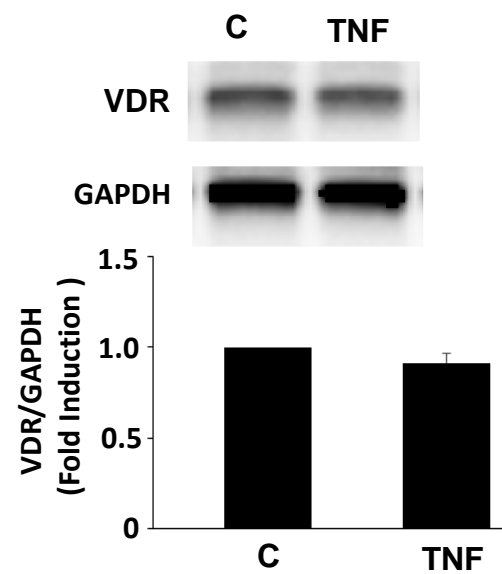

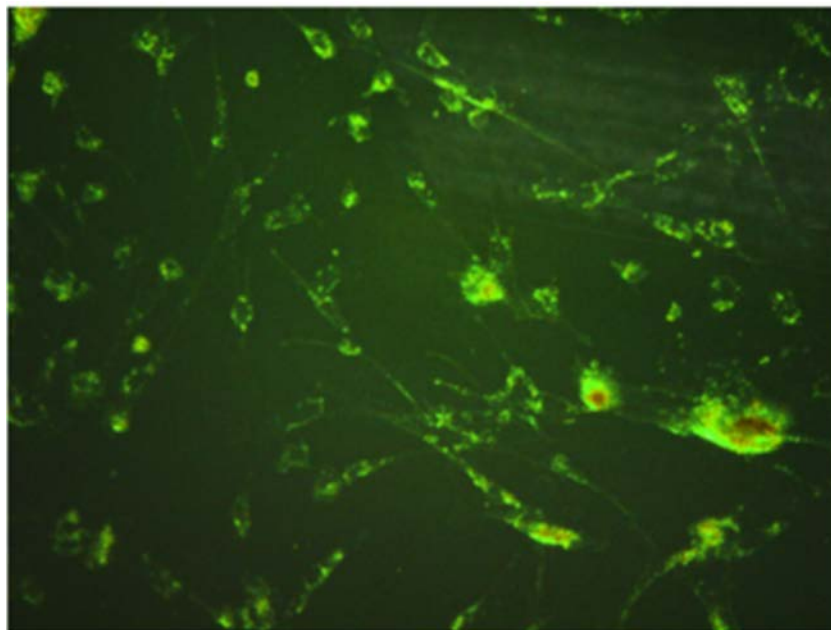

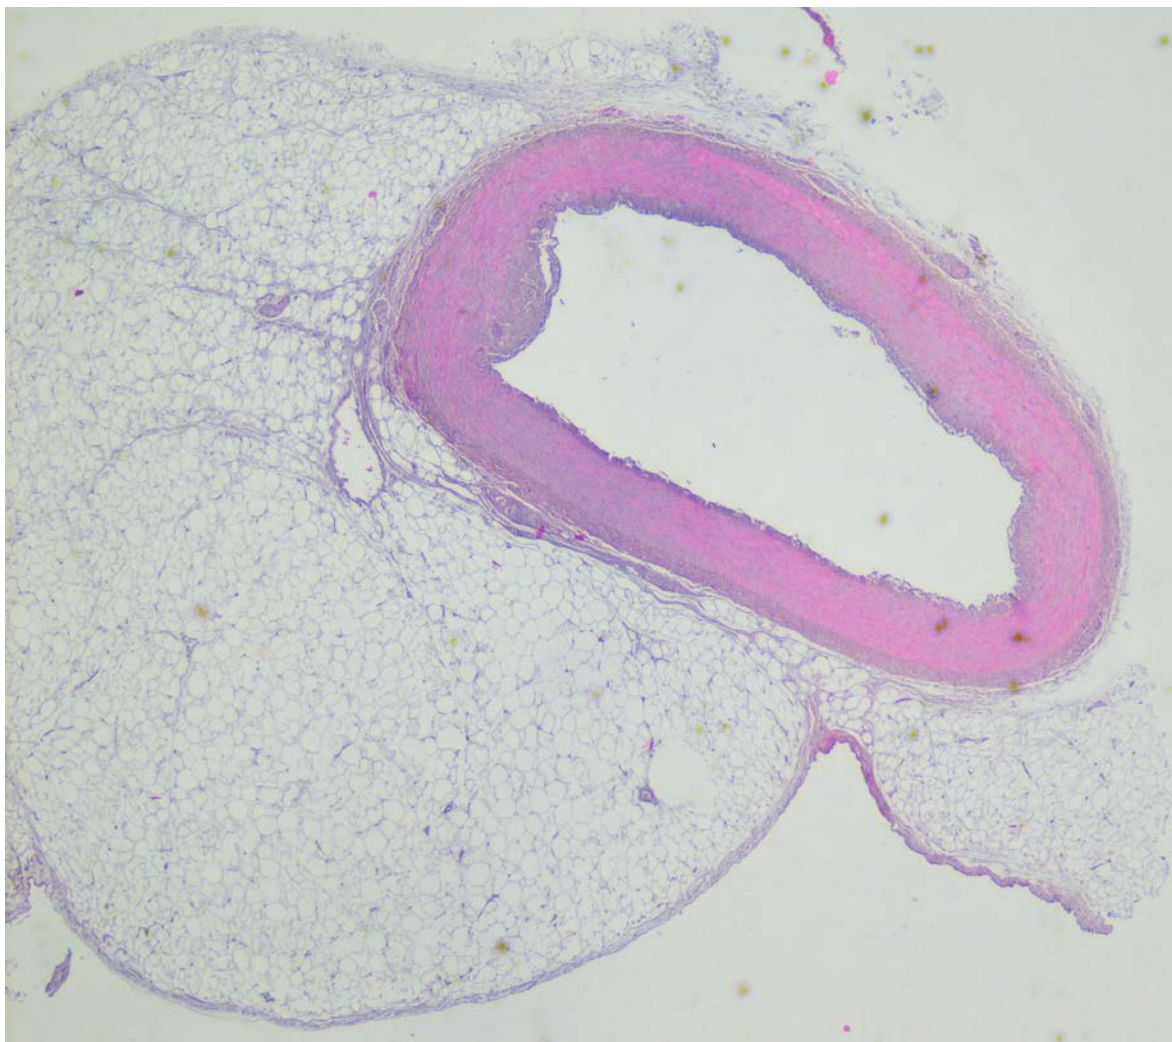

Supplement: NIHMS790453-supplement-Suplemental_Figures_I-V.pdf [file NIHMS790453-supplement-Suplemental_Figures_I-V.pdf]
